# Supplementary material
Source: publisher site journal article supplement (https://www.spandidos-publications.com/8416/downloadSupplementary)
Supplement: Supplementary file 1 [file downloadSupplementary]

Table SI. Detailed information about the primers in the two-reaction system.

| Name | Sequence                             |
|------|--------------------------------------|
| 3F   | 5'-(Biotin)-CCGGTCGCCTTGTCCCCCA-3'   |
| 3R   | 5'-GCAAACTCTACCGTCCAGCG-3'           |
| 2R   | 5'-AGACCAGGAACCCGAGGTG-3'            |
| 4F   | 5'-(Biotin)-GGAATACCCATGTCCTGCCTC-3' |
| 4R   | 5'-GGCGAAGGATCTTCTCACCTTT-3'         |
| SF   | 5'-(Biotin)-GGGCGATCTCTGTGAACTC-3'   |
| SR   | 5'-AGGGCACGTTGTCATGTTGGC-3'          |
| HB1  | 5'-(Biotin)-CCAATTGGTCTACTCCAGGG-3'  |
| HB2  | 5'-TCACCTCTTCCTATCACAAGA-3'          |
| HB3  | 5'-(Biotin)-ATCCGCCAATGCACCACCCT-3'  |
| HB4  | 5'-TGCTCAAACCCCGCATTAT-3'            |

Table SII. Detailed information about the probes on the hybridization membrane strips.

| Probe                 | Sequence                                     |
|-----------------------|----------------------------------------------|
| $\alpha$ -thalassemia |                                              |
| NP( $\alpha$ 2)       | 5'-NH <sub>2</sub> -TACCGTTAAGCTGGAGCCT-3'   |
| 3P( $\alpha$ 3.7)     | 5'-NH <sub>2</sub> -GGGATTTAACTCAACAGGC-3'   |
| SP(SEA)               | 5'-NH <sub>2</sub> -CCCGCTCAGCCTACTTGC-3'    |
| 4P( $\alpha$ 4.2)     | 5'-NH <sub>2</sub> -TGGCACAAAGGCCGACAG-3'    |
| CSN                   | 5'-NH <sub>2</sub> -TACCGTTAAGCTGGAGC-3'     |
| QSN                   | 5'-NH <sub>2</sub> -ACCGTGCTGACCTCCA-3'      |
| CSM                   | 5'-NH <sub>2</sub> -ATACCGTCAAGCTGGAG-3'     |
| QSM                   | 5'-NH <sub>2</sub> -CGTGCCGACCTCCAAA-3'      |
| $\beta$ -thalassemia  |                                              |
| CD41-42-43-N          | 5'-NH <sub>2</sub> -CAGAGGTTCTTTGAGTCCT-3'   |
| CD41-42-M (-TTCT)     | 5'-NH <sub>2</sub> -CCAGAGGTTGAGTCCTTT-3'    |
| CD43-M (G>T)          | 5'-NH <sub>2</sub> -AGGTTCTTTTAGTCCTTTG-3'   |
| CD14-15-17-N          | 5'-NH <sub>2</sub> -CTGCCCTGTGGGGCAAGGT-3'   |
| CD17-M (A>T)          | 5'-NH <sub>2</sub> -TGTGGGGCTAGGTGAACGTG-3'  |
| CD14-15M (+G)         | 5'-NH <sub>2</sub> -GTACTGCCCTGGTGGGGCAA-3'  |
| IVSII-654-N           | 5'-NH <sub>2</sub> -GGTTAAGGCAATAGCAATAG-3'  |
| IVSII-654-M (C>T)     | 5'-NH <sub>2</sub> -AGGTTAAGGTAATAGCAATAG-3' |
| -28/29-N              | 5'-NH <sub>2</sub> -GGCTGGGCATAAAAAGTCAGG-3' |
| -28-M (A>G)           | 5'-NH <sub>2</sub> -CTGGGCATGAAAGTCAGG-3'    |
| -29-M (A>G)           | 5'-NH <sub>2</sub> -CTGGGCATAGAAGTCAG-3'     |
| CD71-72-N             | 5'-NH <sub>2</sub> -GTGCCTTTAGTGATGGCC-3'    |
| CD71-72-M (+A)        | 5'-NH <sub>2</sub> -GTGCCTTTAAGTGATGGC-3'    |
| $\beta$ E-N           | 5'-NH <sub>2</sub> -TGAAGTTGGTGGTGAGG-3'     |
| $\beta$ E-M (G>A)     | 5'-NH <sub>2</sub> -AGTTGGTGGTAAGGCC-3'      |
| IVSI-1-M (G>A)        | 5'-NH <sub>2</sub> -GGGCAGATTGGTATCAAG-3'    |
| IVSI-1-M (G>T)        | 5'-NH <sub>2</sub> -CTGGGCAGTTTGGTATCA-3'    |
| IVSI-5-M (G>C)        | 5'-NH <sub>2</sub> -TGGCAGGTTGCTATCAAG-3'    |
| CD27-28-M (+ C)       | 5'-NH <sub>2</sub> -AGGCCCTGGGCAGGT-3'       |
| InitM (ATG>AGG)       | 5'-NH <sub>2</sub> -ACAGACACCAGGGTGCATCT-3'  |
| CAPM (-AAAC)          | 5'-NH <sub>2</sub> -TAGCAACCTCAGACACCATG-3'  |
| CD 31-N               | 5'-NH <sub>2</sub> -CCTTAGGCTGCTGGTG-3'      |
| CD31-M (-C)           | 5'-NH <sub>2</sub> -CCTTAGGTGCTGGTGGT-3'     |

Table SIII. Thalassemia gene primers for PCR and sequencing.

| Gene                           |           | Sequence, 5'-3'            | Product size, bp |
|--------------------------------|-----------|----------------------------|------------------|
| $\alpha 2$ globin gene         | L         | TCCCCACAGACTCAGAGAGAACC    | 880              |
|                                | D         | AACACCTCCATTGTTGGCACATTCC  |                  |
| $\alpha 1$ globin gene         | L         | TCCCCACAGACTCAGAGAGAACC    | 880              |
|                                | A         | CCATGCCTGGCACGTTTGCTGAG    |                  |
| $\beta$ globin gene (exon 1-2) | $\beta 1$ | GTACGGCTGTCATCACTTAGACCTCA | 600              |
|                                | $\beta 2$ | TGCAGCTTGTCACAGTGCAGCTCACT |                  |
| $\beta$ globin gene (exon 3)   | $\beta 3$ | GTGTACACATATTGACCAAA       | 422              |
|                                | $\beta 4$ | AGCACACAGACCAGCACGTT       |                  |
